# Supplementary material for: Regulation of whole-transcriptome sequencing expression in COPD after personalized precise exercise training: a pilot study
Source: Springer Nature journal article supplement (doi:10.1186/s12931-023-02461-y), 2023-06-13
Supplement: MOESM1 [file 25481810]

**Table S1: Information of patients for RT-qPCR validation**

|                                                        | Normal control<br>(n=10) | COPD<br>(n=10)   | COPD+Exercise<br>(n=10)        | P-value |
|--------------------------------------------------------|--------------------------|------------------|--------------------------------|---------|
| <b>Demographic data</b>                                |                          |                  |                                |         |
| Age, years                                             | 59.90±2.51               | 62.30±24.03      | /                              | 0.127   |
| BMI, Kg/m <sup>2</sup>                                 | 26.31±2.83               | 24.04±4.92       | /                              | 0.222   |
| Male gender                                            | 9(90.0)                  | 9(90.0)          | /                              | >0.9    |
| <b>Smoking History</b>                                 |                          |                  |                                |         |
| Current smoker                                         | 2(20.00)                 | 1(10.00)         | /                              | 0.531   |
| Ex-smoker                                              | 5(50.00)                 | 8(80.00)         | /                              | 0.159   |
| Smoking,<br>(pack-years)                               | 37.10±13.77              | 34.30±12.78      | /                              | 0.642   |
| <b>Lung Function and Cardiopulmonary Exercise Test</b> |                          |                  |                                |         |
| FEV1,%pred                                             | 91.80±5.75               | 42.59±13.41**    | 41.88±14.85                    | 0.000   |
| FEV1/FVC, %                                            | 87.20±4.78               | 41.47±19.87**    | 40.61±19.67                    | 0.000   |
| Peak-VO2                                               | 1350.50±87.26            | 1001.80±370.14** | 1121.90±369.31** <sup>##</sup> | 0.050   |
| <b>CAT score</b>                                       |                          |                  |                                |         |
|                                                        | /                        | 25.20±6.58       | 15.50±6.17 <sup>##</sup>       |         |
| <b>6MWD</b>                                            |                          |                  |                                |         |
|                                                        | 402.60±9.01              | 285.50±88.79**   | 326.90±76.17** <sup>##</sup>   | 0.002   |

Data are presented as mean (SD) or number (percentage); The difference between the Three groups was analyzed by One-way ANOVA; BMI, body mass index; FEV1: forced expiratory volume during the first second; FVC: forced vital capacity, VO2: oxygen consumption, HR: heart rate, SPO2:oxygen saturation, AT: anaerobic threshold; CAT: COPD assessment test; 6MWD:6 minutes walking distance. (\*\* P < 0.001, compared with control group; <sup>##</sup> P < 0.001 compared with COPD group)
